# Supplementary material for: Interplay between worsening kidney function and cardiovascular events in patients with type 2 diabetes: an analysis from the ACCORD trial
Source: HighWire-hosted journal article supplement (doi:10.1136/bmjdrc-2021-002408), 2021-07-01
Supplement: bmjdrc-2021-002408supp001_data_supplement.pdf [file bmjdrc-2021-002408supp001_data_supplement.pdf]

## Supplemental Material

Supplemental Table 1. Simple integer risk model for cardiovascular death or hospitalization for heart failure

| Variable                           | HR (95%CI)       | Coef. | Points | p-value |
|------------------------------------|------------------|-------|--------|---------|
| History of CV disease              | 2.85 (2.43-3.34) | 1.05  | +3     | <0.001  |
| UACR >30 mg/g                      | 2.36 (2.02-2.74) | 0.86  | +2     | <0.001  |
| Age >65 years                      | 1.65 (1.40-1.93) | 0.50  | +2     | <0.001  |
| eGFR <90 ml/min/1.73m <sup>2</sup> | 1.38 (1.16-1.63) | 0.32  | +1     | <0.001  |
| HBA1C >8%                          | 1.36 (1.16-1.59) | 0.31  | +1     | <0.001  |
| Waist circumference (high)         | 1.34 (1.11-1.60) | 0.29  | +1     | 0.002   |
| Men                                | 1.19 (1.01-1.41) | 0.17  | +1     | 0.049   |

Legend: CV, cardiovascular disease including prior hospitalization for heart failure; High waist circumference, >88 cm for women and >102 cm for men; BP, blood pressure; HBA1c, glycated hemoglobin; eGFR, estimated glomerular filtration rate; UACR, urinary albumin-to-creatinine ratio.

Model adjusted on the randomized treatment (intensive vs. standard glucose lowering treatment).

Model C-index for cardiovascular death or hospitalization for heart failure =0.73.

Model C-index for cardiovascular death =0.72.

Total integer score =11 points (n =10251). Risk tertiles: ≤3 points =low risk (n =3453); 4-6 points =medium risk (n =4217); 7-11 points =high risk (n =2581).

Supplemental Table 2. Associations between “sustained” WKF and subsequent cardiovascular mortality

| WKF            | CV death          |                       |                         |          |
|----------------|-------------------|-----------------------|-------------------------|----------|
|                | Event<br>(n =331) | No Event<br>(n =9917) | Adjusted HR<br>(95%CI)* | P-value* |
| >30% eGFR drop | 141<br>(42.6%)    | 4198<br>(42.3%)       | 1.46 (0.94-2.25)        | 0.085    |
| >40% eGFR drop | 88<br>(26.6%)     | 2280<br>(23.0%)       | 1.96 (1.18-3.24)        | 0.009    |
| >50% eGFR drop | 44<br>(13.3%)     | 1047<br>(10.6%)       | 2.67 (1.42-5.02)        | 0.002    |

Legend: CV, cardiovascular; WKF, worsening kidney function; eGFR, estimated glomerular filtration rate.

“Sustained” WKF was defined by an eGFR drop >30%, 40% or 50% in at least 2 consecutive visits separated by a minimum of 3 months.

Supplemental Figure 1. Incidence of cardiovascular death after a hospitalization for heart failure

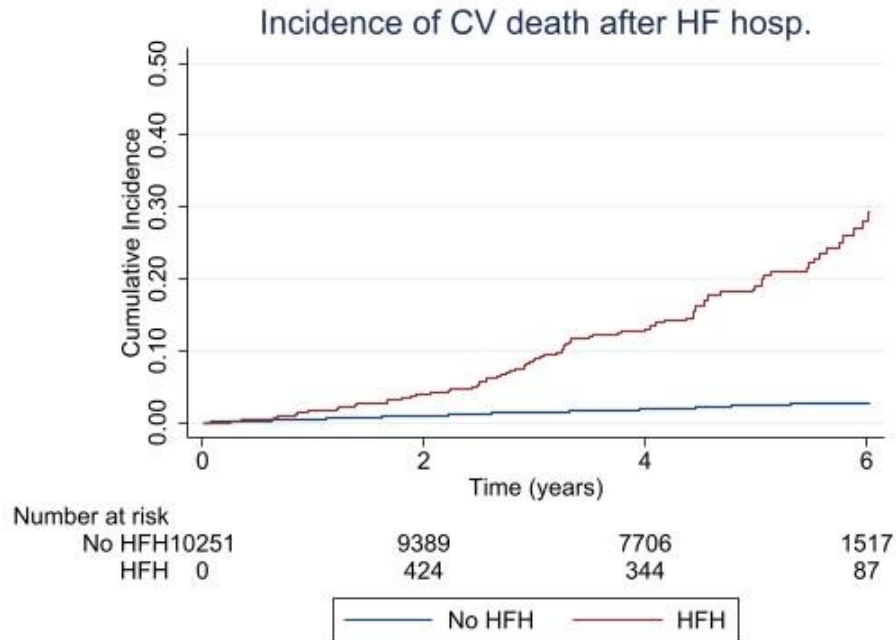

Legend: CV, cardiovascular; HF, heart failure; HFH, heart failure hospitalization. Adjusted HR (95%CI) for the composite of cardiovascular death or heart failure hospitalization after a HHH = 5.17 (3.91-6.83),  $p < 0.001$  (see also the Table 2).

Supplemental Figure 2. E-value analysis to assess the robustness of the associations of an eGFR drop of 30%, 40% and 50% with the outcome of cardiovascular death

A) E-value for >30% eGFR drop

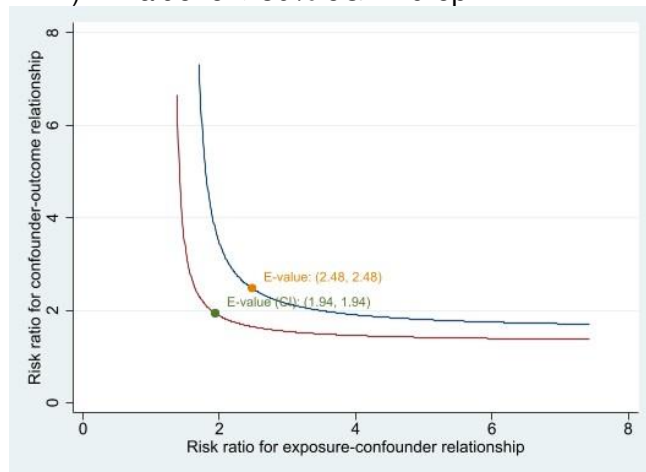

B) E-value for >40% eGFR drop

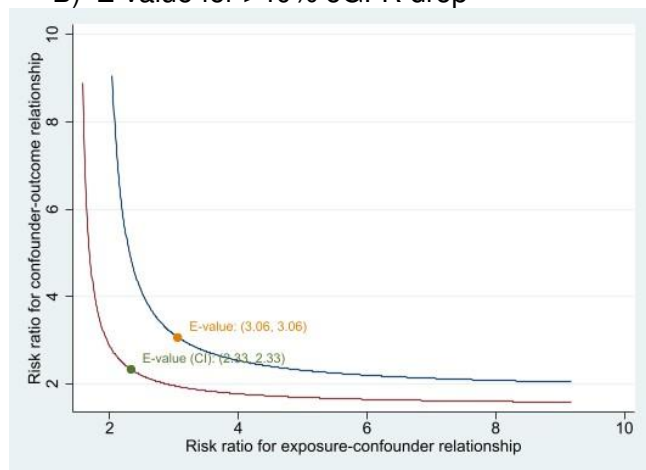

C) E-value for >50% eGFR drop

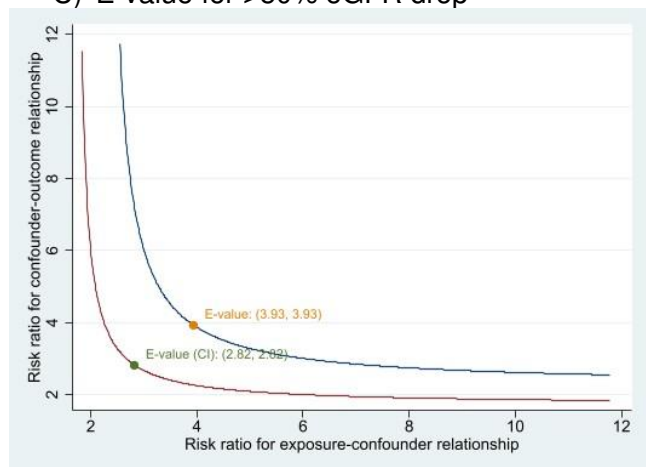

Legend: An eGFR >30% has an E-value of 2.48 which is very close to the hazard ratio observed for urinary albumin-to-creatinine (HR =2.36) ratio and history of cardiovascular disease (HR =2.85), meaning that another (or multiple) covariate(s) with such association(s) could offset the association of an eGFR >30% back to null (HR =1). The E-values for eGFR >40% and >50% are greater than 3, suggesting that it would be unlikely for a covariate to offset these associations back to the null.

Supplemental Figure 3. Joint model for eGFR change throughout the follow-up in patients with and without a cardiovascular death or hospitalization for heart failure composite event

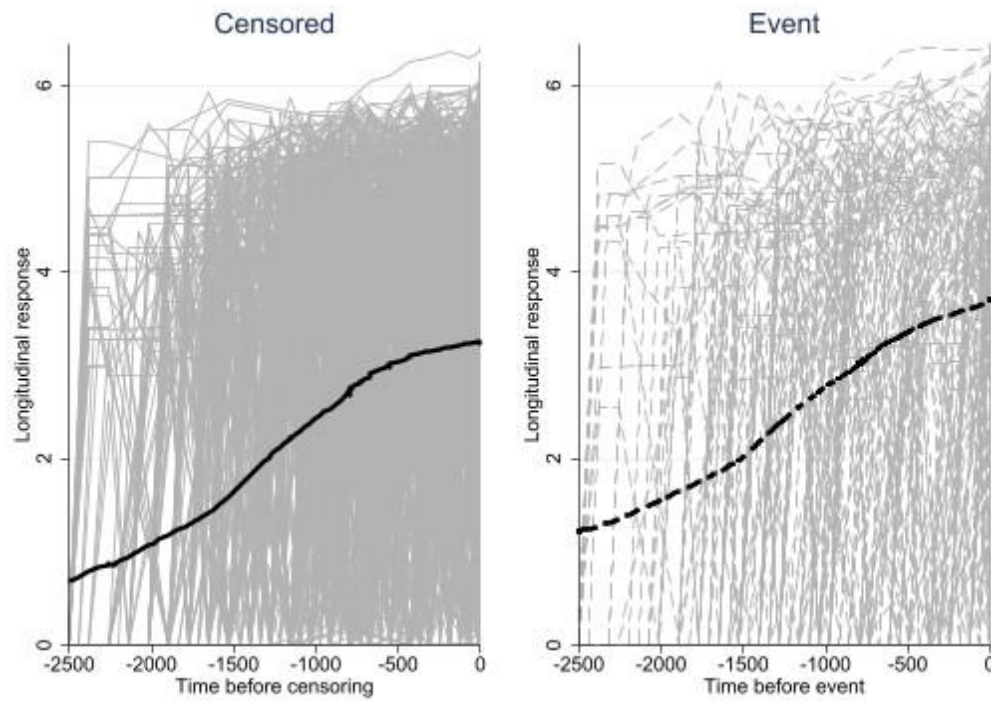

Legend: Event, cardiovascular death or hospitalization for heart failure; eGFR, estimated glomerular filtration rate (log transformed).

Joint-model association of continuous log eGFR change with the composite of cardiovascular death or hospitalization for heart failure: Coef. (95%CI) =0.46 (0.39-0.52),  $p < 0.001$ .

Joint-model association of >40% eGFR drop with the composite of cardiovascular death or hospitalization for heart failure: Coef. (95%CI) =1.85 (1.60-2.11),  $p < 0.001$ .
